# Supplementary material for: Interactions of the chemokines CXCL11 and CXCL12 in human tumor cells
Source: PubMed Central journal article supplement (PMC9768901; doi:10.1186/s12885-022-10451-4), 2022-12-20
Supplement: 12885_2022_10451_MOESM1_ESM.pdf [file 12885_2022_10451_MOESM1_ESM.pdf]

## Additional file 1

List of primary and secondary antibodies.

| Primary antibodies                    | Supplier                                       | Species raised in; clonality | Dilution (application) | Reference    |
|---------------------------------------|------------------------------------------------|------------------------------|------------------------|--------------|
| CXCR4                                 | Abcam, Cambridge, UK                           | Goat, polyclonal             | 1:1000 (WB)            | ab1670       |
| CXCR7                                 | Acris, Herford, Germany                        | Rabbit, polyclonal           | 1:1000 (WB)            | AP17961PU-N  |
| CXCR3                                 | R&D Systems, Minneapolis, MN                   | Mouse, monoclonal            | 1:1000 (WB)            | clone #49801 |
| cleaved caspase-3 (N175)              | Cell Signaling Technologies, Danvers, MA       | Rabbit, polyclonal           | 1:400 (ICC)            | #9661        |
| GAPDH                                 | Fitzgerald Industries International, Acton, MA | Mouse, monoclonal            | 1:5000 (WB)            | 10RG109A     |
| Secondary antibodies                  | Supplier                                       | Species raised in; clonality | Dilution (application) | Reference    |
| Alexa Fluor 488 anti-rabbit           | Thermo Fisher Scientific, Waltham, MA          | Donkey, polyclonal           | 1:200 (ICC)            | A21206       |
| Alexa Fluor 555 anti-rabbit           | Thermo Fisher Scientific                       | Donkey, polyclonal           | 1:200 (ICC)            | A31572       |
| Peroxidase-conjugated IgG anti-rabbit | Jackson ImmunoResearch, West Grove, PA         | Donkey, polyclonal           | 1:10,000 (WB)          | 711-035-152  |
| Peroxidase-conjugated IgG anti-mouse  | Vector Laboratories, Burlingame, CA            | Horse                        | 1:10,000 (WB)          | PI-2000      |

WB, Western blot; ICC, immunocytochemistry
