# Supplementary material for: Interactions of the chemokines CXCL11 and CXCL12 in human tumor cells
Source: PubMed Central journal article supplement (PMC9768901; doi:10.1186/s12885-022-10451-4), 2022-12-20
Supplement: 12885_2022_10451_MOESM2_ESM.pdf [file 12885_2022_10451_MOESM2_ESM.pdf]

## Additional file 2

Overview of chemokine receptors mediating chemotactic and invasive responses of tumor cells to CXCL11 and CXCL12.

|                                | <b>A549</b>   | <b>A767</b>   | <b>A772</b>   | <b>DLD-1</b>  | <b>MDA-231</b> |
|--------------------------------|---------------|---------------|---------------|---------------|----------------|
| Chemotactic response to CXCL11 | CXCR3 + CXCR7 | CXCR3         | CXCR3 + CXCR7 | CXCR3         | CXCR3 + CXCR7  |
| Chemotactic response to CXCL12 | CXCR7         | CXCR4 + CXCR7 | CXCR7         | CXCR7         | CXCR4 + CXCR7  |
| Invasive response to CXCL11    | CXCR3         | CXCR3 + CXCR7 | CXCR3 + CXCR7 | CXCR3 + CXCR7 | CXCR3          |
| Invasive response to CXCL12    | CXCR4 + CXCR7 | CXCR4 + CXCR7 | CXCR4 + CXCR7 | CXCR4 + CXCR7 | CXCR4 + CXCR7  |

Data compiled from Puchert et al. (2018; 2020) and the present study.
