# Supplementary material for: Interactions of the chemokines CXCL11 and CXCL12 in human tumor cells
Source: PubMed Central journal article supplement (PMC9768901; doi:10.1186/s12885-022-10451-4), 2022-12-20
Supplement: 12885_2022_10451_MOESM5_ESM.pdf [file 12885_2022_10451_MOESM5_ESM.pdf]

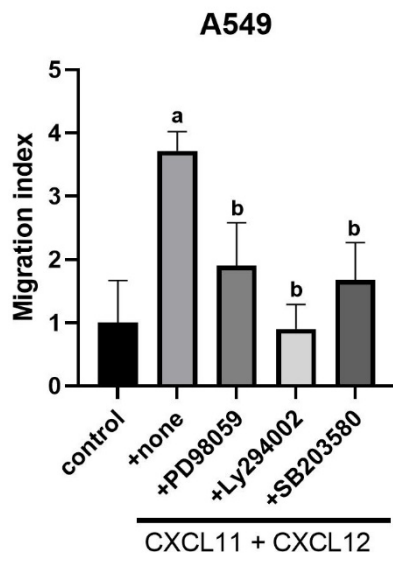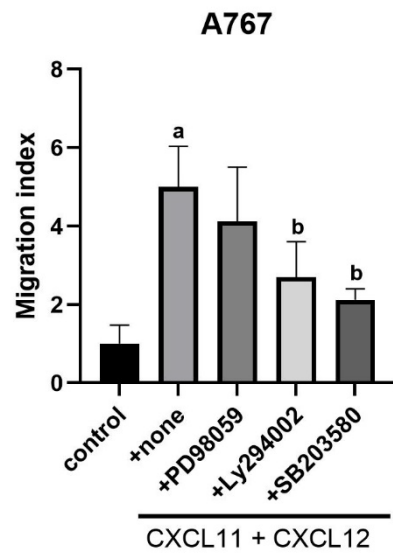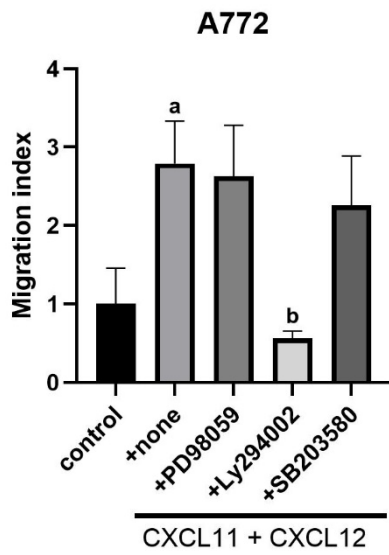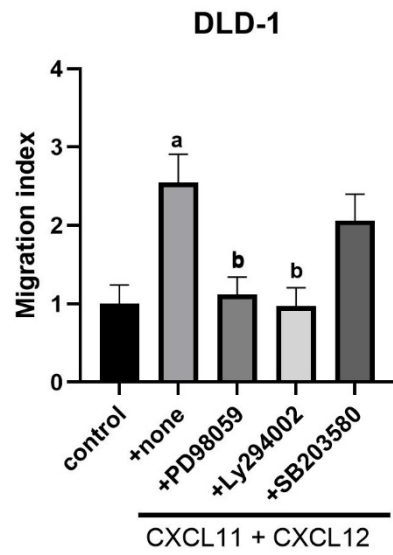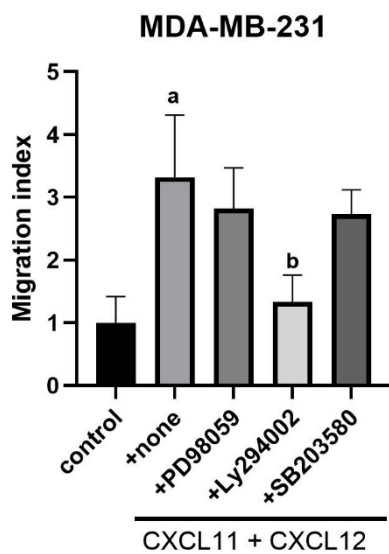

### **Additional file 5**

Effects of signaling pathway inhibitors on chemotactic responses of tumor cells to a combination of CXCL11 and CXCL12.

Cells were treated with PD98059 (20  $\mu$ M), LY294002 (20  $\mu$ M), or SB203580 (10  $\mu$ M) for 1 h, and subsequently tested for their migratory responses to a combination of CXCL12 (100 ng/ml) and CXCL11 (100 ng/ml) in a modified Boyden chamber. Data represent average migration index ( $\pm$ SD) as determined in 3-9 experiments. Note that signaling pathways mediating chemotactic responses are unaltered in cells exposed to a combination to CXCL11 and CXCL12 when compared to single chemokine (see Fig. 3). <sup>a</sup> $p < 0.05$ , presence vs. absence of chemokines; <sup>b</sup> $p < 0.05$ , presence vs. absence of inhibitors.
