# Supplementary material for: Interactions of the chemokines CXCL11 and CXCL12 in human tumor cells
Source: PubMed Central journal article supplement (PMC9768901; doi:10.1186/s12885-022-10451-4), 2022-12-20
Supplement: 12885_2022_10451_MOESM6_ESM.pdf [file 12885_2022_10451_MOESM6_ESM.pdf]

| Cells           | Chemokine       | Inhibitor | % Inhibition +/- SD | n             | p-value |        |
|-----------------|-----------------|-----------|---------------------|---------------|---------|--------|
| A549            | CXCL12          | AMD3100   | 73.9 +/- 11.3       | 8             | <0.001  |        |
|                 |                 | CCX771    | 63.9 +/- 22.2       | 6             | <0.001  |        |
|                 | CXCL11          | AMG481    | 84.6 +/- 4.8        | 6             | <0.001  |        |
|                 |                 | CCX771    | 32.1 +/- 15.1       | 6             | =0.46   |        |
|                 | CXCL12 + CXCL11 | AMD3100   | 42.7 +/- 14.0       | 5             | <0.001  |        |
|                 |                 | CCX771    | 44.4 +/- 17.8       | 5             | <0.001  |        |
|                 |                 | AMG487    | 80.4 +/- 11.4       | 5             | <0.001  |        |
|                 | A767            | CXCL12    | AMD3100             | 78.1 +/- 0.3  | 3       | <0.001 |
|                 |                 |           | CCX771              | 89.1 +/- 2.5  | 3       | <0.001 |
| CXCL11          |                 | AMG487    | 75.9 +/- 3.1        | 3             | <0.001  |        |
|                 |                 | CCX771    | 80.4 +/- 4.9        | 3             | <0.001  |        |
| CXCL12 + CXCL11 |                 | AMD3100   | 72.3 +/- 9.0        | 4             | <0.001  |        |
|                 |                 | CCX771    | 89.4 +/- 3.9        | 3             | <0.001  |        |
|                 |                 | AMG487    | 73.8 +/- 3.0        | 4             | <0.001  |        |
| A722            |                 | CXCL12    | AMD3100             | 92.8 +/- 5.1  | 5       | <0.001 |
|                 |                 |           | CCX771              | 97.1 +/- 3.0  | 5       | <0.001 |
|                 | CXCL11          | AMG481    | 87.1 +/- 13.1       | 5             | <0.001  |        |
|                 |                 | CCX771    | 98.5 +/- 3.1        | 6             | <0.001  |        |
|                 | CXCL12 + CXCL11 | AMD3100   | 94.0 +/- 8.3        | 6             | <0.001  |        |
|                 |                 | CCX771    | 98.3 +/- 4.2        | 6             | <0.001  |        |
|                 |                 | AMG487    | 94.8 +/- 10.1       | 5             | <0.001  |        |
|                 | DLD-1           | CXCL12    | AMD3100             | 91.8 +/- 7.1  | 6       | <0.001 |
|                 |                 |           | CCX771              | 45.3 +/- 5.8  | 3       | <0.001 |
| CXCL11          |                 | AMG481    | 81.1 +/- 11.2       | 6             | <0.001  |        |
|                 |                 | CCX771    | 62.6 +/- 17.4       | 6             | <0.001  |        |
| CXCL12 + CXCL11 |                 | AMD3100   | 85.3 +/- 4.5        | 5             | <0.001  |        |
|                 |                 | CCX771    | 61.3 +/- 8.4        | 4             | <0.01   |        |
|                 |                 | AMG487    | 29.7 +/- 0.2        | 3             | =0.59   |        |
| MDA-MB-231      |                 | CXCL12    | AMD3100             | 93.0 +/- 7.3  | 5       | <0.001 |
|                 |                 |           | CCX771              | 90.5 +/- 10.2 | 7       | <0.001 |
|                 | CXCL11          | AMG481    | 46.1 +/- 11.1       | 6             | <0.01   |        |
|                 |                 | CCX771    | -0.57 +/- 26.6      | 5             | >0.99   |        |
|                 | CXCL12 + CXCL11 | AMD3100   | 85.2 +/- 7.3        | 7             | <0.001  |        |
|                 |                 | CCX771    | 64.2 +/- 14.7       | 6             | <0.001  |        |
|                 |                 | AMG487    | 61.5 +/- 16.7       | 6             | <0.001  |        |

**Additional file 6**

Identification of chemokine receptors mediating invasive responses of tumor cells to CXCL11 and CXCL12.

Cells were treated for 1 h with AMD3100 (10  $\mu$ M); CCX771 (100 nM), or AMG481 (10  $\mu$ M) and subsequently analyzed for CXCL12 (100 ng/ml)- and/or CXCL11 (100 ng/ml)-induced cell invasion using a Boyden chamber in which membranes were coated with Matrigel. Cell numbers were determined after 72h. Effects of receptor antagonists are expressed as % inhibition (mean  $\pm$  SD) of cell invasion occurring in their absence. Note the cell type-specific use of chemokine receptors for mediating invasive responses to CXCL11 and CXCL12.
