# Supplementary material for: Interactions of the chemokines CXCL11 and CXCL12 in human tumor cells
Source: PubMed Central journal article supplement (PMC9768901; doi:10.1186/s12885-022-10451-4), 2022-12-20
Supplement: 12885_2022_10451_MOESM8_ESM.pdf [file 12885_2022_10451_MOESM8_ESM.pdf]

## Additional file 8

Time course of cytostatic-induced death of cancer cells.

|                                                       | 3h | 6h | 12h | 24h |
|-------------------------------------------------------|----|----|-----|-----|
| <b>A549 + cisplatin (20 <math>\mu</math>M)</b>        |    |    |     |     |
| mean (%)                                              | 0  | 1  | 18  | 97  |
| SD                                                    | 0  | 1  | 9   | 5   |
| n                                                     | 3  | 5  | 3   | 4   |
| <b>A767 + temozolomide (100<math>\mu</math>M)</b>     |    |    |     |     |
| mean (%)                                              | 29 | 28 | 22  | 17  |
| SD                                                    | 4  | 11 | 17  | 7   |
| n                                                     | 4  | 4  | 4   | 3   |
| <b>A772 + temozolomide (100 <math>\mu</math>M)</b>    |    |    |     |     |
| mean (%)                                              | 45 | 45 | 45  | 32  |
| SD                                                    | 4  | 14 | 7   | 4   |
| n                                                     | 5  | 5  | 4   | 3   |
| <b>DLD-1 + cisplatin (20 <math>\mu</math>M)</b>       |    |    |     |     |
| mean (%)                                              | 0  | 21 | 28  | 100 |
| SD                                                    | 0  | 6  | 5   | 2   |
| n                                                     | 3  | 5  | 5   | 3   |
| <b>MDA-MB-231 + doxorubicin (1 <math>\mu</math>M)</b> |    |    |     |     |
| mean (%)                                              | 23 | 47 | 99  | 100 |
| SD                                                    | 5  | 8  | 1   | 1   |
| n                                                     | 5  | 5  | 3   | 3   |

Tumor cells were treated with cytostatics for 3h to 24h as indicated. Cells were subsequently fixed and stained with antibodies against cleaved caspase-3. Immunopositive (apoptotic) and immunonegative cells were counted in at least 3 observation fields on a Zeiss confocal laser scan microscope and expressed as the ratio (%) of dead to living cells.
