# Supplementary material for: Interactions of the chemokines CXCL11 and CXCL12 in human tumor cells
Source: PubMed Central journal article supplement (PMC9768901; doi:10.1186/s12885-022-10451-4), 2022-12-20
Supplement: 12885_2022_10451_MOESM9_ESM.pdf [file 12885_2022_10451_MOESM9_ESM.pdf]

## Additional file 9

Dose-dependency of cytostatic-induced death of cancer cells

|                                      | Concentration                |                              |                              |
|--------------------------------------|------------------------------|------------------------------|------------------------------|
| <b>A549 + cisplatin (12h)</b>        | <b>10 <math>\mu</math>M</b>  | <b>20 <math>\mu</math>M</b>  | <b>40 <math>\mu</math>M</b>  |
| mean (%)                             | 12                           | 18                           | 31                           |
| SD (%)                               | 2                            | 10                           | 2                            |
| n                                    | 4                            | 3                            | 5                            |
| <b>A767 + temozolomide (6h)</b>      | <b>50 <math>\mu</math>M</b>  | <b>100 <math>\mu</math>M</b> | <b>200 <math>\mu</math>M</b> |
| mean (%)                             | 22                           | 28                           | 56                           |
| SD (%)                               | 9                            | 12                           | 13                           |
| n                                    | 5                            | 4                            | 4                            |
| <b>A772 + temozolomide (6h)</b>      | <b>50 <math>\mu</math>M</b>  | <b>100 <math>\mu</math>M</b> | <b>200 <math>\mu</math>M</b> |
| mean (%)                             | 48                           | 45                           | 56                           |
| SD (%)                               | 9                            | 14                           | 11                           |
| n                                    | 6                            | 5                            | 5                            |
| <b>DLD-1 + cisplatin (6h)</b>        | <b>10 <math>\mu</math>M</b>  | <b>20 <math>\mu</math>M</b>  | <b>40 <math>\mu</math>M</b>  |
| mean (%)                             | 10                           | 21                           | 14                           |
| SD (%)                               | 4                            | 6                            | 4                            |
| n                                    | 4                            | 5                            | 5                            |
| <b>MDA-MB-231 + doxorubicin (6h)</b> | <b>0.1 <math>\mu</math>M</b> | <b>1 <math>\mu</math>M</b>   | <b>10 <math>\mu</math>M</b>  |
| mean (%)                             | 11                           | 47                           | 100                          |
| SD (%)                               | 6                            | 8                            | 2                            |
| n                                    | 6                            | 5                            | 4                            |

Tumor cells were treated with cytostatics at the indicated concentrations and the ratio (%) of caspase-3-immunoreactive (apoptotic) cells was determined after 6-12h as described in additional file 8.
