# Supplementary material for: Interactions of the chemokines CXCL11 and CXCL12 in human tumor cells
Source: PubMed Central journal article supplement (PMC9768901; doi:10.1186/s12885-022-10451-4), 2022-12-20
Supplement: 12885_2022_10451_MOESM10_ESM.pdf [file 12885_2022_10451_MOESM10_ESM.pdf]

### A549

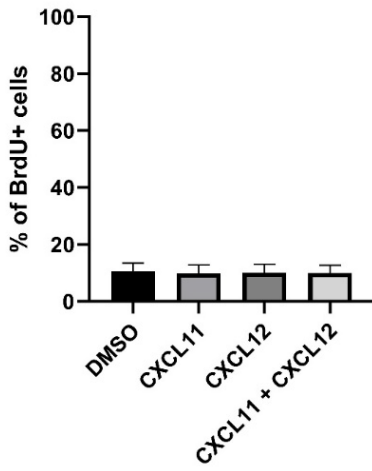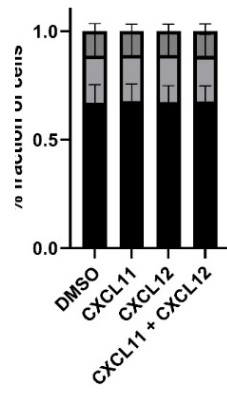

### A767

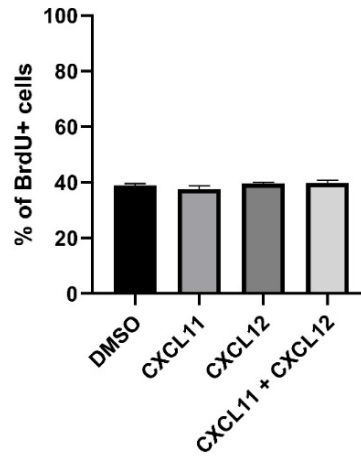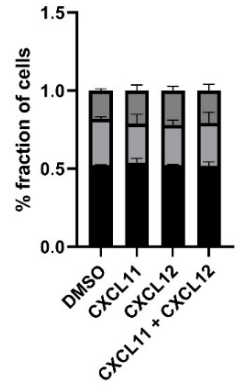

### A772

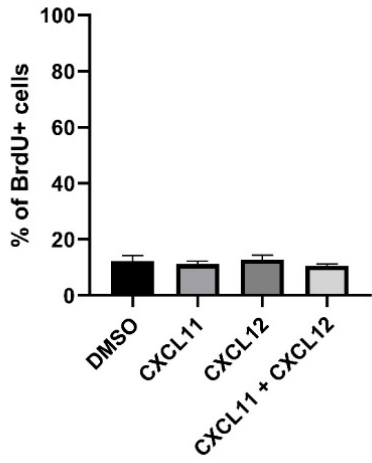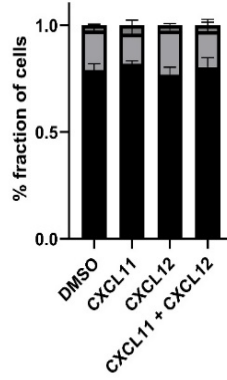

### DLD-1

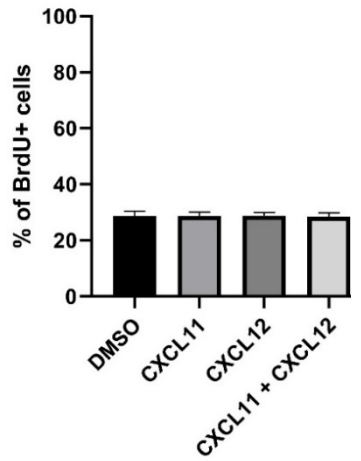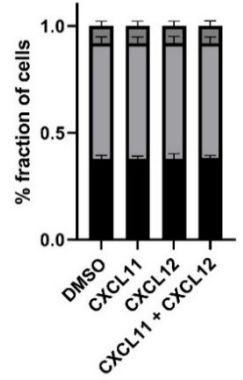

### MDA-MB-231

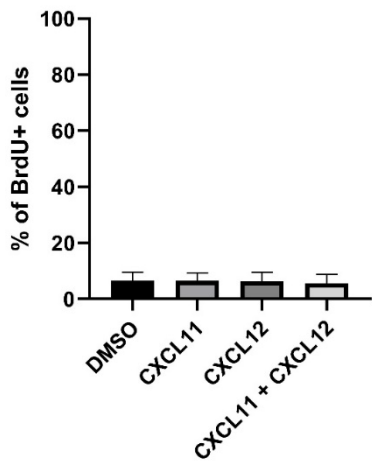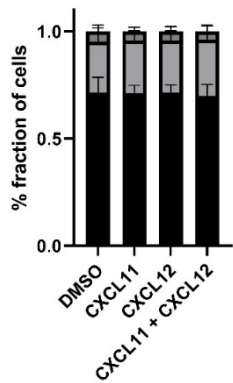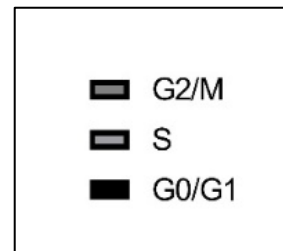

**Additional file 10**

CXCL11 and/or CXCL12 remain without effects on tumor cell proliferation.

Cells were maintained with serum-free medium supplemented with CXCL11 (100ng/ml) and/or CXCL12 (100ng/ml) for 24h. The final 2h, medium was additionally supplemented with bromodeoxyuridine (10  $\mu$ M). For FACS analysis, cells were stained for BrdU and DNA was labelled with 7-AAD. Data show average fraction (%)  $\pm$ SD of labeled cells as determined in 4-6 experiments.
